# Supplementary material for: Graphene oxide/gold nanorod plasmonic paper – a simple and cost-effective SERS substrate for anticancer drug analysis
Source: Royal Society of Chemistry journal article supplement (doi:10.1039/d0nj02448a), 2020-01-01
Supplement: d0nj02448a1.pdf [file d0nj02448a1.pdf]

## Graphene oxide/gold nanorod plasmonic paper - a simple and cost-effective SERS substrate for anticancer drug analysis

Kanyawan Ponlamuangdee<sup>a,b</sup>, Gabor L. Hornyak<sup>b</sup>, Tanujjal Bora<sup>b</sup>, Suwussa Bamrungsap<sup>a,\*</sup>

<sup>a</sup> National Nanotechnology Center (NANOTEC), National Science and Technology Development Agency (NSTDA), Pathumthani 12120, Thailand

<sup>b</sup> Center of Excellence in Nanotechnology, Department of Industrial Systems Engineering, School of Engineering and Technology, Asian Institute of Technology (AIT), Pathumthani 12120, Thailand

**Table S1.** Transverse and longitudinal SPR absorption bands of AuNRs in different circumstances.

| AuNRs substrate       | Transverse band (nm) | Longitudinal band (nm) |
|-----------------------|----------------------|------------------------|
| AuNRs solution        | 522                  | 660                    |
| AuNRs on filter paper | 518                  | 628                    |
| AuNRs on GO paper     | 516                  | 624                    |

**Fig. S1.** Plasmon absorption spectra of AuNRs on different substrates

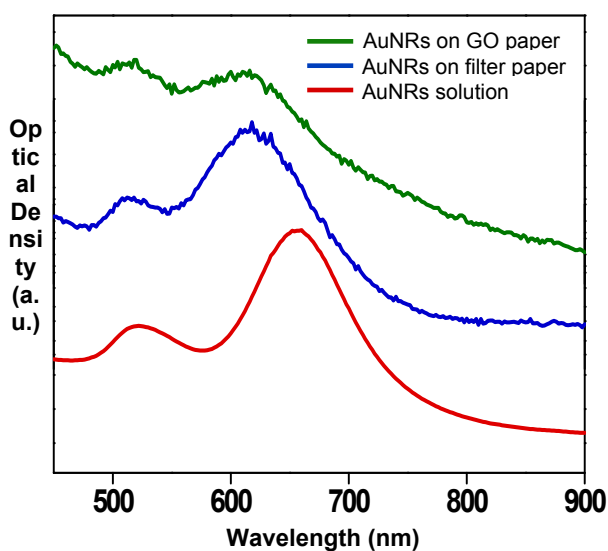

a

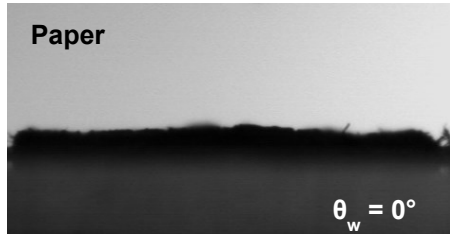

b

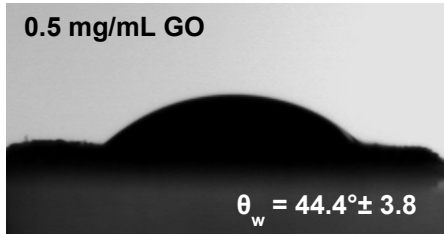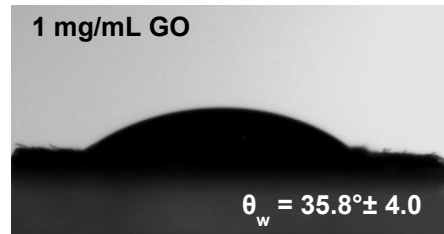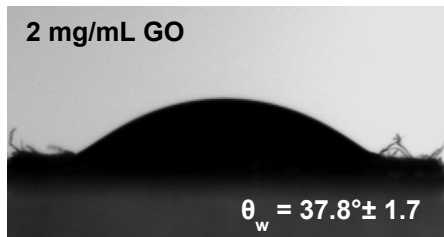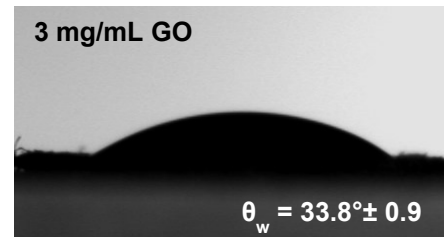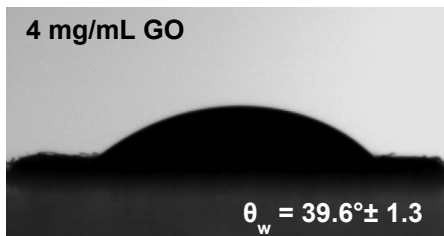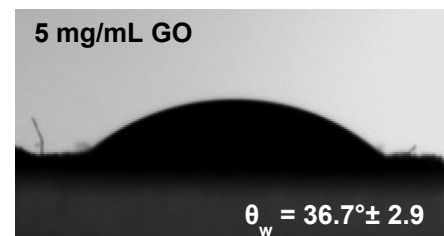

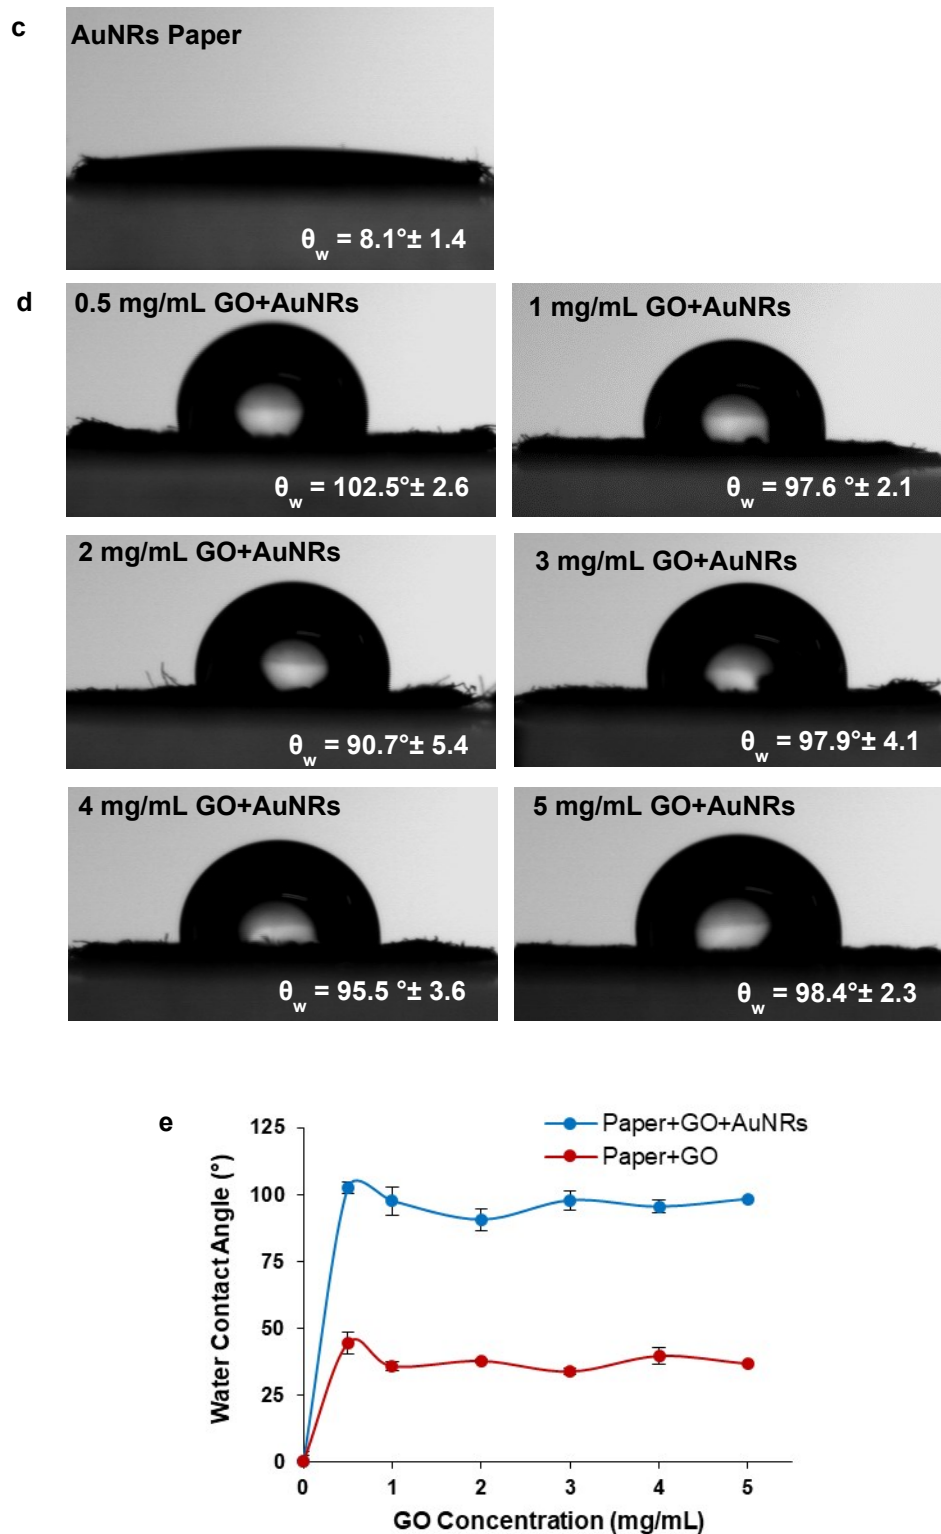

**Fig. S2.** Water contact angle (WCA) measured on (a) filter paper (b) GO coated filter paper prepared with various GO concentration (c) AuNRs coated filter paper (d) GO-AuNRs coated filter paper prepared with various GO concentration. (e) Graph corresponding to the independence of WCA on the paper substrates for different GO concentration. Zero mg/mL of GO concentration is the WCA measured on filter paper.

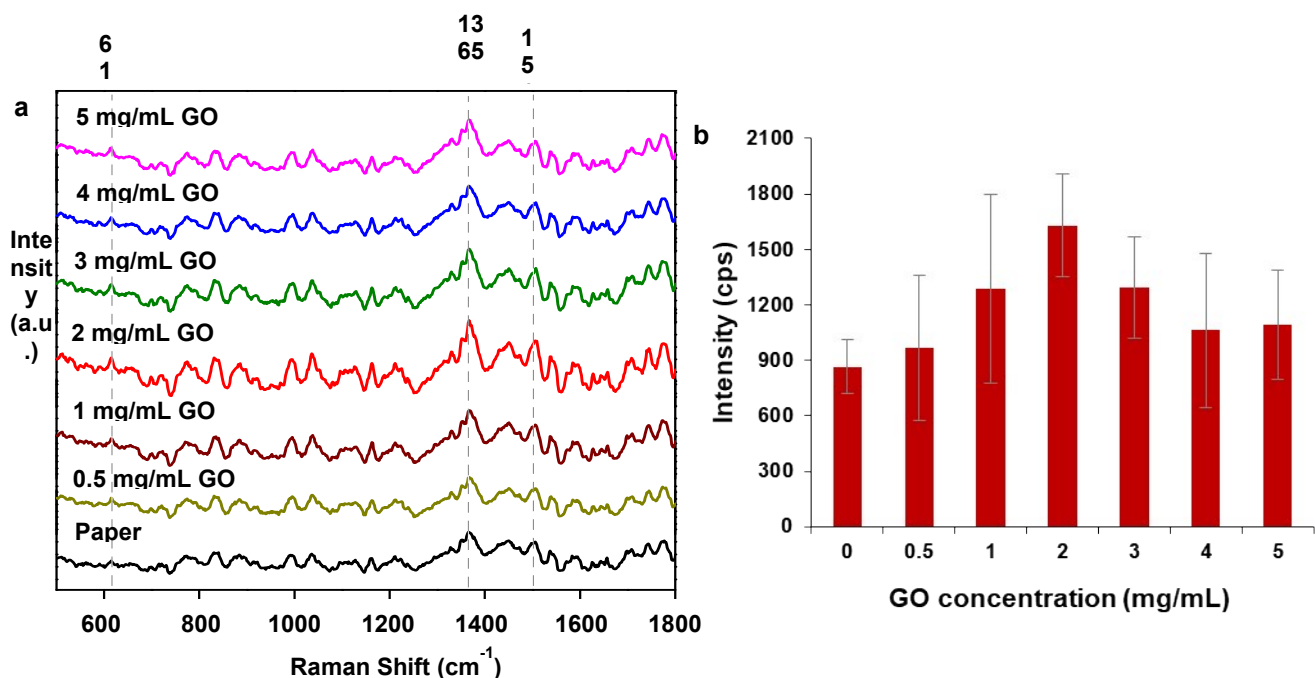

**Fig. S3.** (a) SERS spectra of 10 mM R6G obtained from GO coated filter paper at different GO concentration. (b) The SERS intensity of R6G at 1365 cm<sup>-1</sup> collected from these papers substrates.

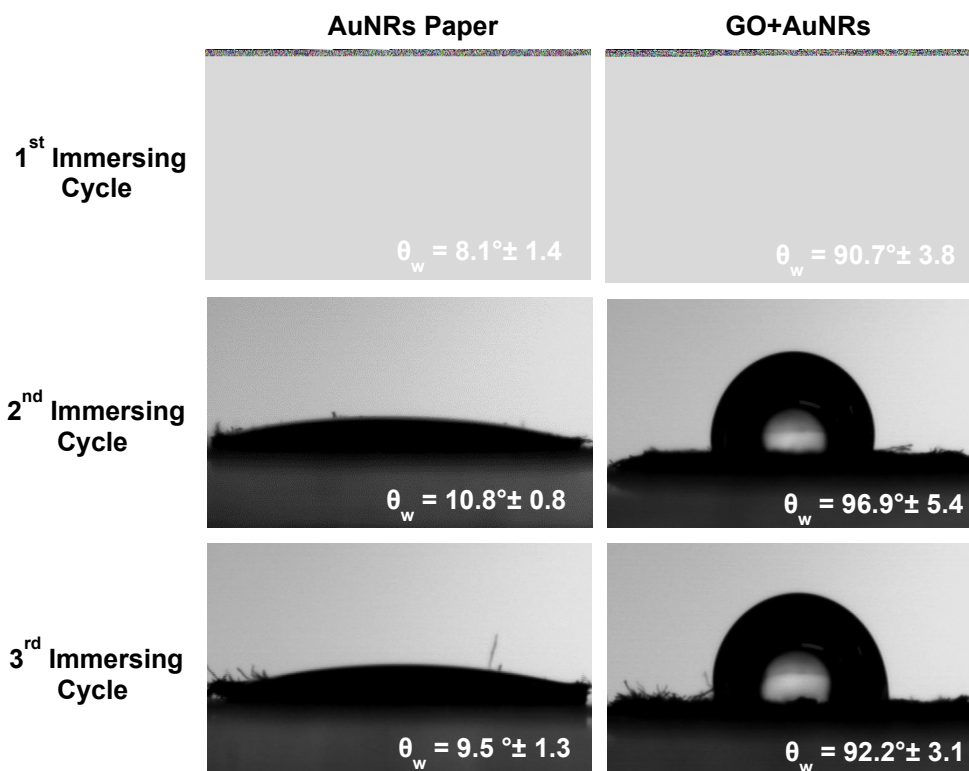

**Fig. S4.** WCA measured on plasmonic paper fabricated by filter paper coated with different immersing cycles of AuNRs and the plasmonic paper fabricated by filter paper coated with 2 mg/mL GO with different immersing cycles of AuNRs.

**Table S2.** Calculation of enhancement factor of plasmonic paper considering Raman shift of R6G molecule at 1365  $\text{cm}^{-1}$ .

| $C_{\text{sers}}$ (M)  | $I_{\text{sers}}$ | $C_{\text{Raman}}$ (M) | $I_{\text{Raman}}$ | $I_{\text{SERS}}/I_{\text{Raman}}$ | $C_{\text{Raman}}/C_{\text{SERS}}$ | EF                 |
|------------------------|-------------------|------------------------|--------------------|------------------------------------|------------------------------------|--------------------|
| $1.00 \times 10^{-10}$ | 82                | $1.00 \times 10^{-3}$  | 18                 | 4.56                               | $1.00 \times 10^7$                 | $4.56 \times 10^7$ |

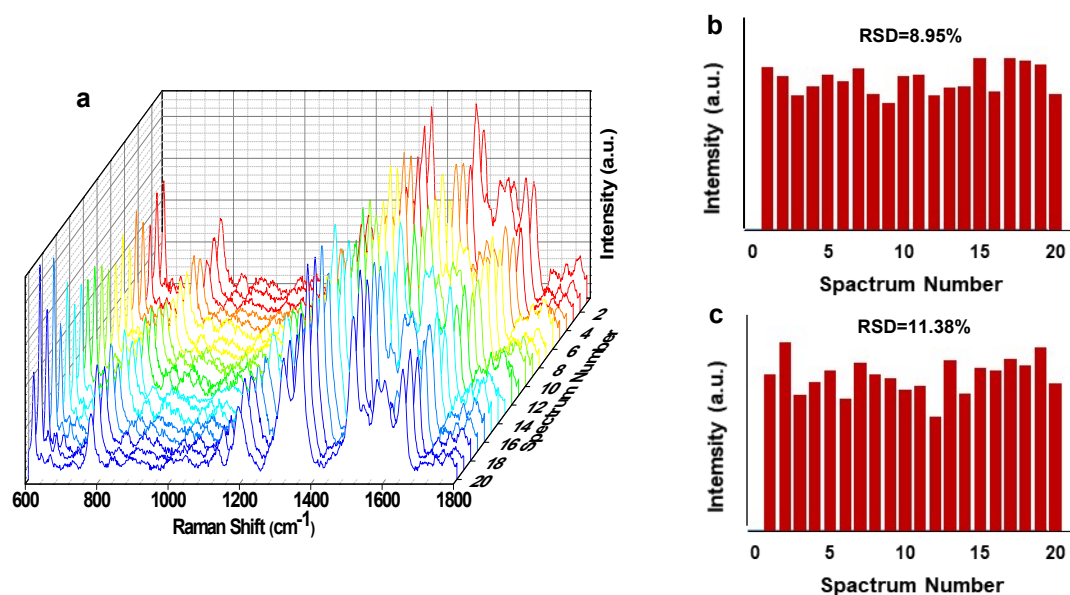

**Fig. S5.** (a) SERS spectra of 10 mM R6G collected from 20 random spots on GO-AuNR plasmonic paper. The SERS intensity and RSD of specific Raman peak at (b) 1365  $\text{cm}^{-1}$  and (c) 1510  $\text{cm}^{-1}$  obtained from the same plasmonic paper.
